# Supplementary material for: The synthesis of diphenolic acid using the periodic mesoporous H3PW12O40-silica composite catalysed reaction of levulinic acid
Source: Royal Society of Chemistry journal article supplement (doi:10.1039/b702739g), 2007-01-01

## **Electronic Supplementary Information**

**Communication Ref.: B702739G**

**Title: The synthesis of diphenolic acid using the periodic mesoporous H<sub>3</sub>PW<sub>12</sub>O<sub>40</sub>-silica composite catalysed reaction of levulinic acid**

**Fig. S1** Raman scattering spectra of (A)  $\text{H}_3\text{PW}_{12}\text{O}_{40}$ , (B)  $\text{H}_3\text{PW}_{12}\text{O}_{40}/\text{SBA-15-C-15.7}$  and (C)  $\text{H}_3\text{PW}_{12}\text{O}_4/\text{SBA-15-E-17.5}$ .

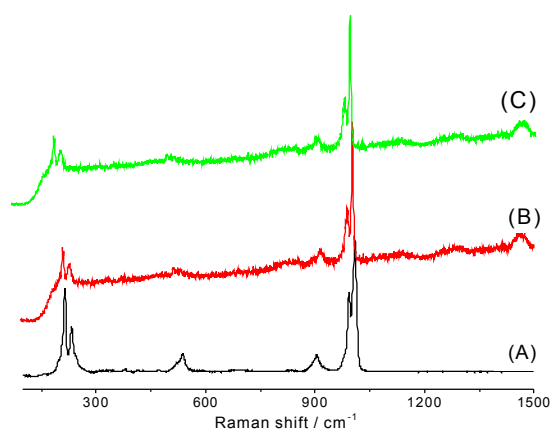

**Fig. S2** Low-angle XRD patterns of the  $\text{H}_3\text{PW}_{12}\text{O}_{40}/\text{SBA-15}$  composites.

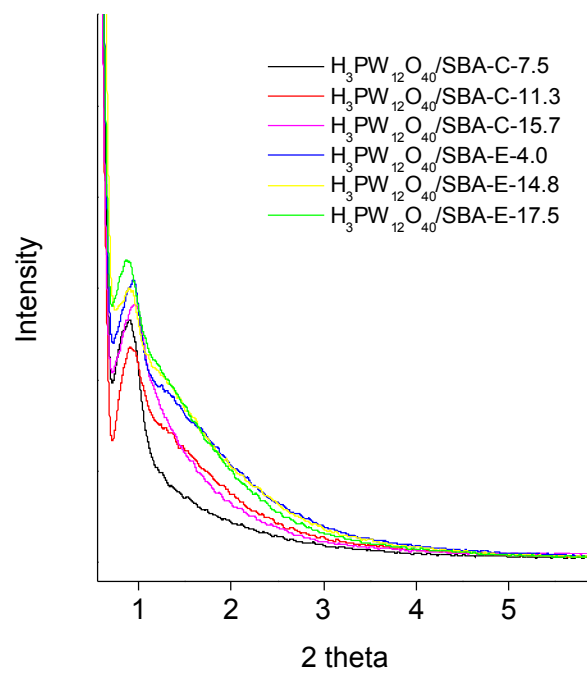

Supplement: b702739g.pdf [file b702739g.pdf]
